# Supplementary material for: A paper-based ratiometric fluorescence sensor based on carbon dots modified with Eu3+ for the selective detection of tetracycline in seafood aquaculture water
Source: Royal Society of Chemistry journal article supplement (doi:10.1039/d3an02133e), 2024-01-01
Supplement: d3an02133e1.pdf [file d3an02133e1.pdf]

## Electronic Supplementary Information

### **A paper-based ratiometric fluorescence sensor based on carbon dots modified with Eu<sup>3+</sup> for selective detection of tetracycline in seafood aquaculture water**

Jialu Zhang,<sup>a</sup> Yuanyuan Chen,<sup>b</sup> Ji Qi,<sup>\*c</sup> Qinglan Miao,<sup>b</sup> Dongmei Deng,<sup>\*b</sup> Haibo He,<sup>b</sup>

Xiaoxia Yan<sup>b</sup> and Liqiang Luo<sup>\*b</sup>

<sup>a</sup> *School of Medicine, Shanghai University, Shanghai 200444, China*

<sup>b</sup> *College of Sciences, Shanghai University, Shanghai 200444, China*

<sup>c</sup> *CAS Key Laboratory of Coastal Environmental Processes and Ecological Remediation, Research Centre for Coastal Environmental Engineering and Technology, Yantai Institute of Coastal Zone Research, Chinese Academy of Sciences, Yantai 264003, China*

## **Contents:**

**Fig. S1** Optimization of experimental conditions: Effect of CDs with different concentrations on (A) one-step grafting CDs-Eu@paper and (B) step-by-step grafting CDs@paper-Eu; Effect of reaction time of CDs and Eu<sup>3+</sup> on (C) one-step grafting CDs-Eu@paper and (D) step-by-step grafting CDs@paper-Eu.

**Fig. S2** Optimization of experimental conditions: Effect of pH on (A) one-step grafting CDs-Eu@paper and (B) step-by-step grafting CDs@paper-Eu; Effect of reaction time on (C) one-step grafting CDs-Eu@paper and (D) step-by-step grafting CDs@paper-Eu.

**Fig. S3** Analysis of TC standard samples by HPLC.

**Table S2** Determination of TC on CDs-Eu@paper in aquaculture water.

**Table S3** Determination of TC on CDs@paper-Eu in aquaculture water.

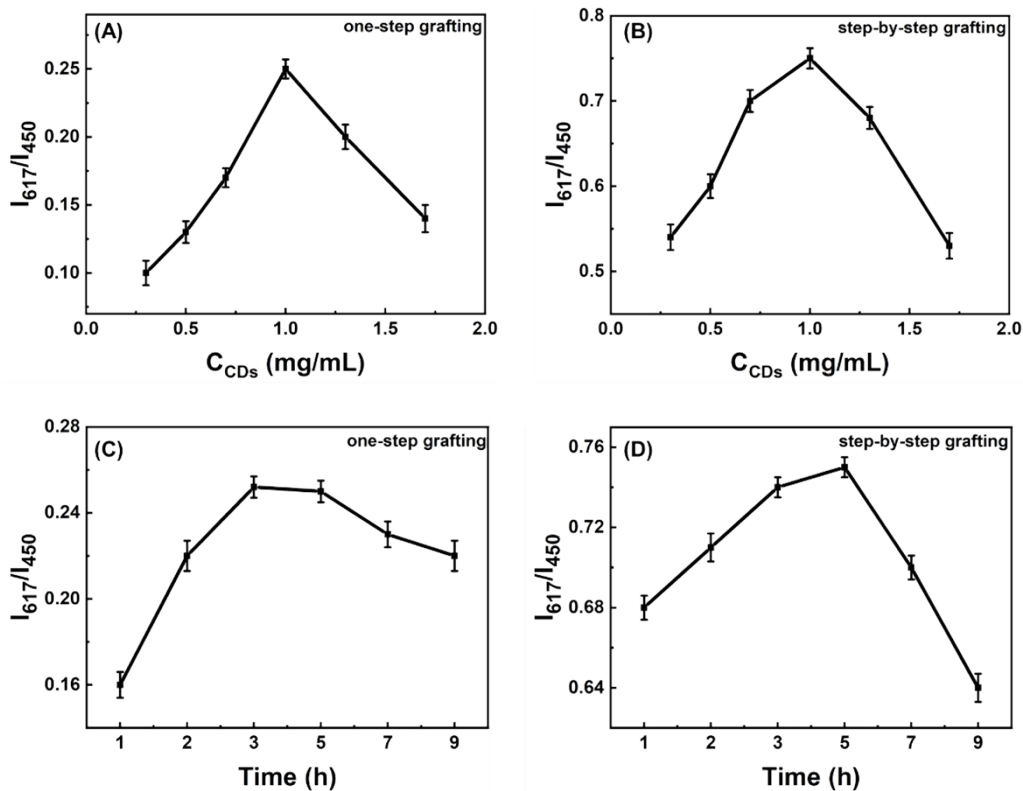

**Fig. S1** Optimization of experimental conditions: Effect of CDs with different concentrations on (A) one-step grafting CDs-Eu@paper and (B) step-by-step grafting CDs@paper-Eu; Effect of reaction time of CDs and  $\text{Eu}^{3+}$  on (C) one-step grafting CDs-Eu@paper and (D) step-by-step grafting CDs@paper-Eu.

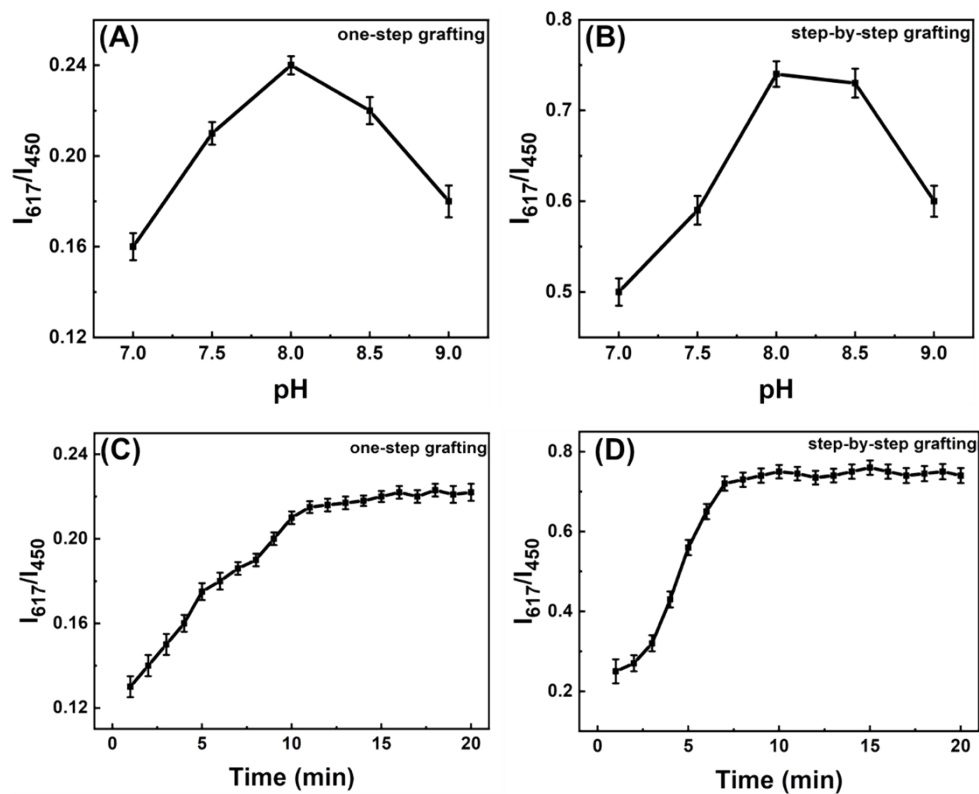

**Fig. S2** Optimization of experimental conditions: Effect of pH on (A) one-step grafting CDs-Eu@paper and (B) step-by-step grafting CDs@paper-Eu; Effect of reaction time on (C) one-step grafting CDs-Eu@paper and (D) step-by-step grafting CDs@paper-Eu.

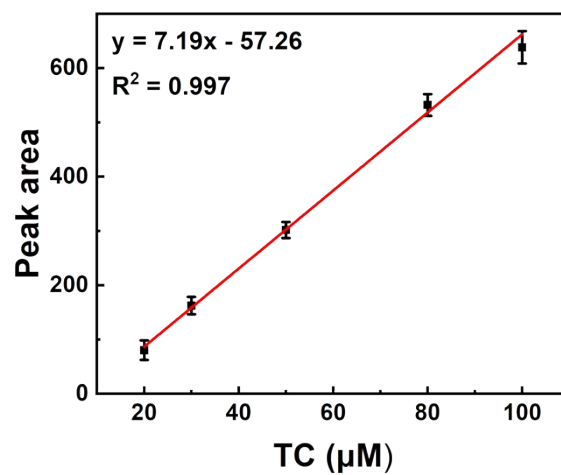

Fig. S3 Analysis of TC standard samples by HPLC.

**Table S2** Determination of TC on CDs-Eu@paper in aquaculture water.

| <b>Sample</b>                                        | <b>Blank<br/>(<math>\mu\text{M}</math>)</b> | <b>Added TC<br/>(<math>\mu\text{M}</math>)</b> | <b>Found TC<br/>(<math>\mu\text{M}</math>)</b> | <b>Recovery<br/>(%)</b> | <b>RSD<br/>(%)</b> | <b>HPLC</b> |
|------------------------------------------------------|---------------------------------------------|------------------------------------------------|------------------------------------------------|-------------------------|--------------------|-------------|
|                                                      |                                             | 20                                             | 22.6                                           | 102.7                   | 3.62               | 23.04       |
| Aquaculture water<br>(South America white<br>shrimp) | 0                                           | 30                                             | 33.7                                           | 112.3                   | 6.37               | 32.01       |
|                                                      |                                             | 50                                             | 47.4                                           | 94.8                    | 5.48               | 52.43       |
|                                                      |                                             | 20                                             | 22.3                                           | 111.5                   | 6.85               | 22.8        |
| Aquaculture water<br>(Sea cucumbers)                 | 0                                           | 30                                             | 32.5                                           | 108.3                   | 7.52               | 30.8        |
|                                                      |                                             | 50                                             | 52.5                                           | 105                     | 4.27               | 48.9        |

**Table S3** Determination of TC on CDs@paper-Eu in aquaculture water.

| <b>Sample</b>                                        | <b>Blank<br/>(<math>\mu\text{M}</math>)</b> | <b>Added TC<br/>(<math>\mu\text{M}</math>)</b> | <b>Found TC<br/>(<math>\mu\text{M}</math>)</b> | <b>Recovery<br/>(%)</b> | <b>RSD<br/>(%)</b> | <b>HPLC</b> |
|------------------------------------------------------|---------------------------------------------|------------------------------------------------|------------------------------------------------|-------------------------|--------------------|-------------|
|                                                      |                                             | 20                                             | 22.4                                           | 112                     | 7.89               | 23.04       |
| Aquaculture water<br>(South America white<br>shrimp) | 0                                           | 30                                             | 31.7                                           | 105.6                   | 4.63               | 32.01       |
|                                                      |                                             | 50                                             | 48.4                                           | 96.8                    | 3.24               | 52.43       |
|                                                      |                                             | 20                                             | 23.2                                           | 116                     | 5.37               | 22.8        |
| Aquaculture water<br>(Sea cucumbers)                 | 0                                           | 30                                             | 31.6                                           | 105.3                   | 3.49               | 30.8        |
|                                                      |                                             | 50                                             | 51.2                                           | 102.4                   | 2.84               | 48.9        |
